# Supplementary material for: Anti-Glycolipid Antibody Examination in Five EAE Models and Theiler’s Virus Model of Multiple Sclerosis: Detection of Anti-GM1, GM3, GM4, and Sulfatide Antibodies in Relapsing-Remitting EAE
Source: MDPI journal article supplement (doi:10.3390/ijms241612937), 2023-08-18
Supplement: s1 [file s1]

**Supplementary Table S1.** Correlations of anti-glycolipid antibody levels with EAE scores in PLP-sensitized mice<sup>a</sup>

| Anti-glycolipid antibody | PLP <sub>139-152</sub> -sensitized mice (n = 18) <sup>b</sup> |      |                    | symptomatic EAE mice (n = 17) <sup>c</sup> |                  |       | EAE mice with limb paralysis (n = 15) <sup>d</sup> |                  |       |
|--------------------------|---------------------------------------------------------------|------|--------------------|--------------------------------------------|------------------|-------|----------------------------------------------------|------------------|-------|
|                          | $r_s$                                                         | $p$  | Power <sup>e</sup> | $r_s$                                      | $p$              | Power | $r_s$                                              | $p$              | Power |
| GM1                      | -0.34                                                         | 0.16 | 0.29               | <b>-0.51</b>                               | <b>&lt; 0.05</b> | 0.58  | <b>-0.74</b>                                       | <b>&lt; 0.01</b> | 0.92  |
| GM3                      | -0.17                                                         | 0.49 | 0.10               | -0.24                                      | 0.34             | 0.16  | -0.42                                              | 0.12             | 0.36  |
| GM4                      | 0.01                                                          | 0.98 | 0.05               | -0.23                                      | 0.33             | 0.15  | <b>-0.60</b>                                       | <b>&lt; 0.05</b> | 0.70  |
| sulfatide                | -0.11                                                         | 0.66 | 0.07               | -0.16                                      | 0.55             | 0.10  | -0.23                                              | 0.39             | 0.13  |

<sup>a</sup>We sensitized 18 SJL/J mice with PLP<sub>139-151</sub>, collected sera from the mice on days 14–21, and determined serum anti-glycolipid antibody levels (Abs<sub>492 nm</sub>) by ELISA. Neurological signs were evaluated using EAE scores. Since both Abs<sub>492 nm</sub> and EAE scores are non-parametric data, we used Spearman rank correlation to analyze the association between the antibody levels and EAE scores [66].

<sup>b</sup>In most EAE models, the induction rate of full-blown EAE (with hind limb paralysis, EAE scores  $\geq 2$ ) was not 100%. In this study, we found 15 of 18 (83%) mice had EAE scores of 2 or higher on days 14–21; one mouse did not develop any EAE signs, and two mice had only tail paralysis. We analyzed the correlations using data from all 18 mice sensitized with PLP<sub>139-151</sub> and found no significant correlation ( $P > 0.05$ ).

<sup>c</sup>When we used the data from all symptomatic EAE mice, excluding one asymptomatic mouse (EAE score = 0), anti-GM1 antibody levels had a moderate negative correlation with EAE scores statistically ( $r_s = -0.51$ ,  $p < 0.05$ ). We interpreted a Spearman correlation coefficient (“ $r_s$ ” or  $\rho$ ) based on Mukaka (2012) as follows: 0.7 to 1.0 (–0.7 to –1.0) high positive (negative) correlation; 0.5 to 0.7 (–0.5 to –0.7), moderate positive (negative) correlation; 0.3 to 0.5 (–0.3 to –0.5), low positive (negative) correlation; and 0 to 0.3 (0 to –0.3) negligible correlation.

<sup>d</sup>When we used the data from mice who developed hind limb paralysis (EAE score = 2 or higher), excluding one asymptomatic mouse and two mice who had only tail paralysis (EAE score = 1), anti-GM1 antibody levels had a high negative correlation with EAE scores ( $r_s = -0.74$ ,  $p < 0.01$ ); anti-GM4 antibody titers had a moderate negative correlation with EAE scores statistically ( $r_s = -0.6$ ,  $p < 0.05$ ).

<sup>e</sup>Power analysis was conducted, using an R version 4.3.0 and the package “WebPower” version 0.9.3 [67,68].
